# Inhibition of sPLA<sub>2</sub>-IIA Prevents LPS-Induced Neuroinflammation by Suppressing ERK1/2-cPLA<sub>2</sub> $\alpha$ Pathway in Mice Cerebral Cortex

Yanxiao Xiang<sup>1</sup>, Lin Chen<sup>1</sup>, Huiqing Liu<sup>1</sup>, Xiaoqian Liu<sup>1</sup>, Xinbing Wei<sup>1</sup>, Baozhu Sun<sup>2</sup>, Tian Wang<sup>3</sup>, Xiumei Zhang<sup>1\*</sup>

**1** Department of Pharmacology, Shandong University School of Medicine, Jinan, Shandong, PR China, **2** Department of Anesthesiology, Qilu Hospital, Shandong University, Jinan, PR China, **3** Department of Pharmacology, Yantai University School of Pharmacy, Yantai, Shandong, PR China

## Abstract

Neuroinflammation is involved in various central nervous system (CNS) disorders, including brain infections, ischemia, trauma, stroke, and degenerative CNS diseases. In the CNS inflammation, secretory phospholipase A<sub>2</sub>-IIA (sPLA<sub>2</sub>-IIA) acts as a mediator, resulting in the generation of the precursors of pro-inflammatory lipid mediators, such as prostaglandins (PGs) and leukotrienes (LTs). However, the role of sPLA<sub>2</sub>-IIA in neuroinflammation is more complicated and remains unclear yet. In the present study, we investigated the effect of sPLA<sub>2</sub>-IIA inhibition by specific inhibitor SC-215 on the inflammation in LPS-induced mice cerebral cortex and primary astrocytes. Our results showed that the inhibition of sPLA<sub>2</sub>-IIA alleviated the release of PGE<sub>2</sub> by suppressing the activation of ERK1/2, cPLA<sub>2</sub> $\alpha$ , COX-2 and mPGES-1. These findings demonstrated that sPLA<sub>2</sub>-IIA showed the potential to regulate the neuroinflammation in vivo and in vitro, indicating that sPLA<sub>2</sub>-IIA might be a novel target for the treatment of acute neuroinflammation.

**Citation:** Xiang Y, Chen L, Liu H, Liu X, Wei X, et al. (2013) Inhibition of sPLA<sub>2</sub>-IIA Prevents LPS-Induced Neuroinflammation by Suppressing ERK1/2-cPLA<sub>2</sub> $\alpha$  Pathway in Mice Cerebral Cortex. PLoS ONE 8(10): e77909. doi:10.1371/journal.pone.0077909

**Editor:** Allan Siegel, University of Medicine & Dentistry of NJ - New Jersey Medical School, United States of America

**Received:** June 18, 2013; **Accepted:** September 16, 2013; **Published:** October 9, 2013

**Copyright:** © 2013 Xiang et al. This is an open-access article distributed under the terms of the Creative Commons Attribution License, which permits unrestricted use, distribution, and reproduction in any medium, provided the original author and source are credited.

**Funding:** This work was supported by the Natural Science Foundation of Shandong Province, China (Nos. ZR2010HM132 and ZR2010HM082) and the Graduate Independent Innovation Foundation of Shandong University, GIIFSDU (No 21300072613091). The funders had no role in study design, data collection and analysis, decision to publish, or preparation of the manuscript.

**Competing Interests:** The authors have declared that no competing interests exist.

\* E-mail: zhangxm@sdu.edu.cn

## Introduction

Neuroinflammation is a process principally associated with an activation of astrocytes and microglia by inflammatory mediators in central nervous system (CNS) disorders, including brain infections, brain inflammation, ischemia, trauma, stroke, and degenerative CNS diseases, such as Alzheimer disease (AD), Parkinson's disease (PD), and axonal degeneration in multiple sclerosis (MS) [1]. Cytokines, chemokines, reactive nitrogen species [2,3] and prostaglandins (PGs) [4] are upregulated in the process of inflammation. Prostaglandin E<sub>2</sub> (PGE<sub>2</sub>) is one of the central inflammatory markers and key mediators of neuroinflammation induced by ischemia and bacterial infection [5,6].

In the CNS inflammation, secretory phospholipase A<sub>2</sub>-IIA (sPLA<sub>2</sub>-IIA) is known as a mediator to hydrolyze fatty acids from the *sn*-2 position of membrane phospholipids, resulting in the generation of free arachidonic acid (AA) and lysophospholipids which are the precursors of pro-inflammatory lipid mediators, such as prostaglandins (PGs) and leukotrienes (LTs) [7]. As the most abundant isoform of sPLA<sub>2</sub> [8,9], sPLA<sub>2</sub>-IIA is originally isolated from inflammatory fluids and cells and identified to play a prominent role in inflammation and infectious diseases [10] [11]. sPLA<sub>2</sub>-IIA is generally localized in the hippocampus and cerebral cortex in brains of ischemia and AD [12,13]. Due to its phospholipase enzymatic activity, sPLA<sub>2</sub>-IIA interacts with cytosolic phospholipase A<sub>2</sub> (cPLA<sub>2</sub>) to supply AA to downstream

cyclooxygenase-2 (COX-2) for PGE<sub>2</sub> biosynthesis [14]. However, the exact role of sPLA<sub>2</sub>-IIA in neuroinflammation remains unclear.

Mitogen-activated protein kinases (MAPK), including ERK1/2 and p38, are critical regulators of proinflammatory cytokines (PGE<sub>2</sub>, TNF- $\alpha$ , IL-6 and IL-1 $\beta$ ) during inflammation. The biosynthesis of PGE<sub>2</sub> is regulated by cPLA<sub>2</sub> $\alpha$  [14], which is activated by MAPK. Recent work has demonstrated that activation of p38 kinase by thrombin regulated cPLA<sub>2</sub> activation and lipid release in human platelet [15], ATP or ionomycin-stimulated phosphorylation of ERK1/2 is required for the activation of cPLA<sub>2</sub> in Madin-Darby canine kidney (MDCK) cells [16]. However, it is not known whether ERK1/2 or p38 kinase plays a role in the deleterious effect of LPS on CNS. In the CNS, activated astrocytes and microglia are the main sources of PGs during neuroinflammation [17,18]. Astrocytes are the predominant immunocompetent cells in the brain where they act not only as central effectors of cerebral immune and inflammatory diseases such as Parkinson's disease [19] and stroke [20], but also as an important sensor of invading pathogens including bacteria and viruses [21]. Bacterial endotoxins can induce the synthesis and release of proinflammatory mediators, i.e., chemokines and eicosanoids in astrocytes [22]. Previous study has shown that astrocytes are not only a source of PGE<sub>2</sub>, but also a target of its modulatory action in immune and inflammatory processes in CNS [23].

In the present study, RT-PCR analysis revealed that LPS exposure led to a time- and dose- dependent increase of sPLA<sub>2</sub>-IIA mRNA expression in murine primary astrocytes but not in primary microglial cells. Therefore, we used primary astrocytes to study the role of sPLA<sub>2</sub>-IIA in lipopolysaccharide (LPS)-induced acute neuroinflammation in vitro. Furthermore, the neuroinflammation in vivo induced by the intracerebroventricle microinjection (i.c.v.) of LPS was employed to explore the regulation of MAPK-cPLA<sub>2</sub>α-PGE<sub>2</sub> pathways by sPLA<sub>2</sub>-IIA in mice cerebral cortex.

## Materials and Methods

### Materials

The following chemicals and materials were purchased, LPS from *Escherichia coli* 0111:B4 (Sigma, St. Louis, USA), the specific group IIA sPLA<sub>2</sub> inhibitor, SC-215 (Santa Cruz, California, USA), cPLA<sub>2</sub>α inhibitor, AACOCF<sub>3</sub> (Calbiochem, San Diego, CA), antibody against sPLA<sub>2</sub>-IIA (BioVendor, Candler, NC), antibody against phospho-ERK1/2, phospho-p38 and cPLA<sub>2</sub>α, and the total protein, COX-2, mPGES-1 (Cell signaling Technology, Danvers, MA), anti-gial fibrillary acidic protein (GFAP) monoclonal antibody for astrocytes (Bioss, Beijing), the p38 MAP kinase inhibitor (SB203580), the MEK<sub>1</sub>/MEK<sub>2</sub> inhibitor (U0126) (Sigma Chemical Co. St. Louis, MO), Dulbecco's modified Eagle's medium (DMEM) and other materials for cell culture (Gibco, Carlsbad, USA).

### Mice and production of CNS inflammation

Zero to one-day-old Wistar rat pups were purchased from the Experimental Animals Center, Shandong University. Male C57BL/6 mice (6–8 weeks old) were purchased from Beijing Vital River Company. Mice were housed in polypropylene cages and maintained at 21°C under a reverse-phase 12 h light, 12 h dark cycle with free access to water and rodent chow. All the protocols of experiments were approved by the Institutional Care and Use Committee of Shandong University and performed according to the Guide for the Care and Use of Laboratory Animals published by the US National Institutes of Health.

Intracerebroventricle microinjection was performed as previously described [24] with minor modifications. LPS was dissolved in sterile normal saline at a concentration of 1 mg/ml. On test day, mice were anesthetized by intraperitoneal injection (i.p.) with mixture of ketamine (100 mg/kg) and xylazine (10 mg/kg) and placed in a stereotaxic apparatus. The scalp was shaved and sterilized and a burr hole was drilled according to the following coordinates: 2.0 mm lateral to the midline and 1 mm caudal to bregma. Mice were received i.c.v. injection with 2.5 μg LPS [25] or subjected to i.c.v. injection with 1.218 μg SC-215901 1 hour before the LPS injection using a Harvard Apparatus syringe pump. Mice in vehicle control group received i.c.v. injection with 2.5 μL saline or 2 μL DMSO. The concentration of LPS and SC-215 was identified to induce optimal responses in preliminary experiments and has been used by a number of other laboratories [26]. The solutions were injected into the ventricle over a 2-min period, and the needle was left in the injection site for 4 minutes before it was slowly removed. The wound was sutured and the mice were euthanized at various time (10, 20, 30, 60 minutes) thereafter and the brains were removed, dissected and stored at –80°C.

### Primary astrocyte cultures

Primary astrocyte cultures were prepared from the cortices of 0 to 1-day-old Wistar rat pups as previously described [27] with minor modifications. Briefly, cerebral cortices were dissected and meninges were removed in Petri dishes with D-Hanks balanced

salt solution. The tissues were thoroughly diced with scalpels and suspended in 10 volumes 0.25% (w/v) trypsin and incubated for 20 min at 37°C. The same volume contains 10% (v/v) fetal bovine serum in high glucose DMEM was added to stop cleavage. After centrifugation (5 min, 200 g, 25°C), the supernatant was discarded and the pellet was dispersed in new medium containing high glucose DMEM (added 5.5 mM glucose) with addition of 20% FBS, 100 units/mL penicillin, and 100 μg/mL streptomycin. Then, the cell suspension was filter through 85 μm nylon mesh and transferred to poly-L-lysine coated 75 cm<sup>2</sup> culture flasks. The culture medium was changed after 24 h and then every 3 days afterwards. When the cells became confluent after 2 weeks of culturing, flasks were shaken at 200 rpm on an orbital shaker at 37°C for 3 h to remove non-astrocyte cells. Cells were >95% positive for GFAP, the astrocytic marker. Cells were washed trypsinized and subcultured in 6-well (1.0×10<sup>6</sup>) plates, selected cells were pretreated with varying concentrations of SC-215, U0126 or SB203580 for 2 hours. DMSO, at concentrations similar to comparative experiments, was used as an appropriate control and never exceeded 0.1%. Selected cells were then treated with LPS and the incubations ranged from 5 minutes to 240 minutes, as indicated in the text.

### Reverse transcription-polymerase chain reaction (RT-PCR) analysis

After incubation, media was removed and cultured cells were washed with phosphate-buffered saline (PBS) twice. Total RNA was prepared from cells by using the Trizol<sup>®</sup> reagent (Invitrogen Corporation, Carlsbad, CA, USA) according to the manufacturer's protocol. cDNA was prepared using reverse transcriptase originating from the Superscript<sup>™</sup>-III kit (Invitrogen) with 2.5 μg total RNA and oligo dT. The sequences of PCR primers were as follows: sPLA<sub>2</sub>-IIA, upper primer 5'-AAGGAAGCCGCACTCAGTTA-3' and lower primer 5'-GGCAGCAGCCTTATCACACT-3'; GAPDH, upper primer 5'-CAAGGTCATCCACGACCAC-3' and lower primer 5'-CCAGTGAGTTTCCCGTTCAG-3'. GAPDH expression was used as an internal calibrator for equal RNA loading and to normalize relative expression data for sPLA<sub>2</sub>-IIA gene analyzed.

### Western blot analysis

Protein concentration was measured by using a BCA protein assay kit and loaded on the 10% Acrylamide-SDS-PAGE at 120 V in duplicates for electrophoresis and then transferred to NC (Nitrocellulose) membranes at 200 mA for one hour. Membranes were then blocked in Tris-buffered saline, pH 7.4 (TBS) with 0.1% Tween 20 (TBS-T) containing 5% non-fat milk for one hour at room temperature and then incubated with primary antibodies against TLR4/CD284 (1:1000), sPLA<sub>2</sub>-IIA (1:500); phospho-ERK1/2 and ERK1/2 (1:10000), phospho-cPLA<sub>2</sub>α and cPLA<sub>2</sub>α (1:1000) and GAPDH (1:1000) overnight at 4°C. After washing with TBS-T, blots were incubated with secondary antibodies for one hour at room temperature. Immunolabeling was detected by ECL (Millipore). For quantification, blots were scanned and the band intensities were measured as optical density using the Quantity One program (BioRad, Hercules, CA) and normalized against GAPDH loading control.

### Determination of PGE<sub>2</sub> concentration

Samples from the cortex were collected at different time as described above. The samples were weighted and homogenized. Then the PGE<sub>2</sub> concentration of the supernatant was measured by means of ELISA-based assay (Cayman Chemical) [28].

**Statistical Analysis**

All data are presented as means ± S.E.M. from three or more independent experiments. For time-response and SC-215 dose-response studies, statistical analysis was assessed by either Student's t test or one-way ANOVA followed by post hoc Bonferroni tests. For other experiments, statistical analysis was assessed by two-way ANOVA followed by post hoc Bonferroni tests to compare differences between the various treatment groups. In all cases, differences with *p* value < 0.05 were regarded as statistically significant.

**Results**

**Inhibition of sPLA<sub>2</sub>-IIA reduces PGE<sub>2</sub> production in LPS-stimulated neuroinflammation**

In order to understand the anti-inflammatory effect of sPLA<sub>2</sub>-IIA inhibition, we first quantified the PGE<sub>2</sub> metabolites in mice cortex. I.c.v. administration of LPS induced PGE<sub>2</sub> generation (Fig. 1A) and a concomitant release of sPLA<sub>2</sub>-IIA in the cortex of mice (Fig. 1D). To investigate the effect of sPLA<sub>2</sub>-IIA on PGE<sub>2</sub> release, a highly specific sPLA<sub>2</sub>-IIA inhibitor, SC-215, was presented to the lateral ventricle together with LPS. SC-215 is reported to block

the enzymatic activity of sPLA<sub>2</sub>-IIA via highly selective binding to the active center of sPLA<sub>2</sub>-IIA, with an IC<sub>50</sub> as low as 29 nM in rats [29,30]. Our results showed that the addition of SC-215 (1.218 μg) with LPS (2.5 μg) showed a nearly 90% decrease in sPLA<sub>2</sub>-IIA expression (Fig. 1E). As expected, PGE<sub>2</sub> production were significantly inhibited (>75%) in the cortex of SC-215-treated mice at this time point (Fig. 1B). These results indicated that sPLA<sub>2</sub>-IIA was involved in LPS-stimulated acute neuroinflammation via mediating PGE<sub>2</sub> generation. Attenuated the sPLA<sub>2</sub>-IIA expression and generation of PGE<sub>2</sub> were confirmed in vitro in primary rat astrocytes that were pretreated with SC-215 then exposed to LPS for 4 hours (Fig. 1, C and F). Since our preliminary results indicated that LPS exposure led to a time- and dose-dependent increase of sPLA<sub>2</sub>-IIA mRNA expression in murine primary astrocytes (data not shown) but not induce increase of sPLA<sub>2</sub>-IIA mRNA or protein expression in the primary microglia (Fig. S1), we used astrocytes to simulate similar inflammatory situation in vitro to study the role of sPLA<sub>2</sub>-IIA in LPS-stimulated route of PGE<sub>2</sub> biosynthetic pathway. Western blotting (Fig. 1F) showed that SC-215 (1.25 μM) reduced the sPLA<sub>2</sub>-IIA protein expression by 85–90%. SC-215 treatment

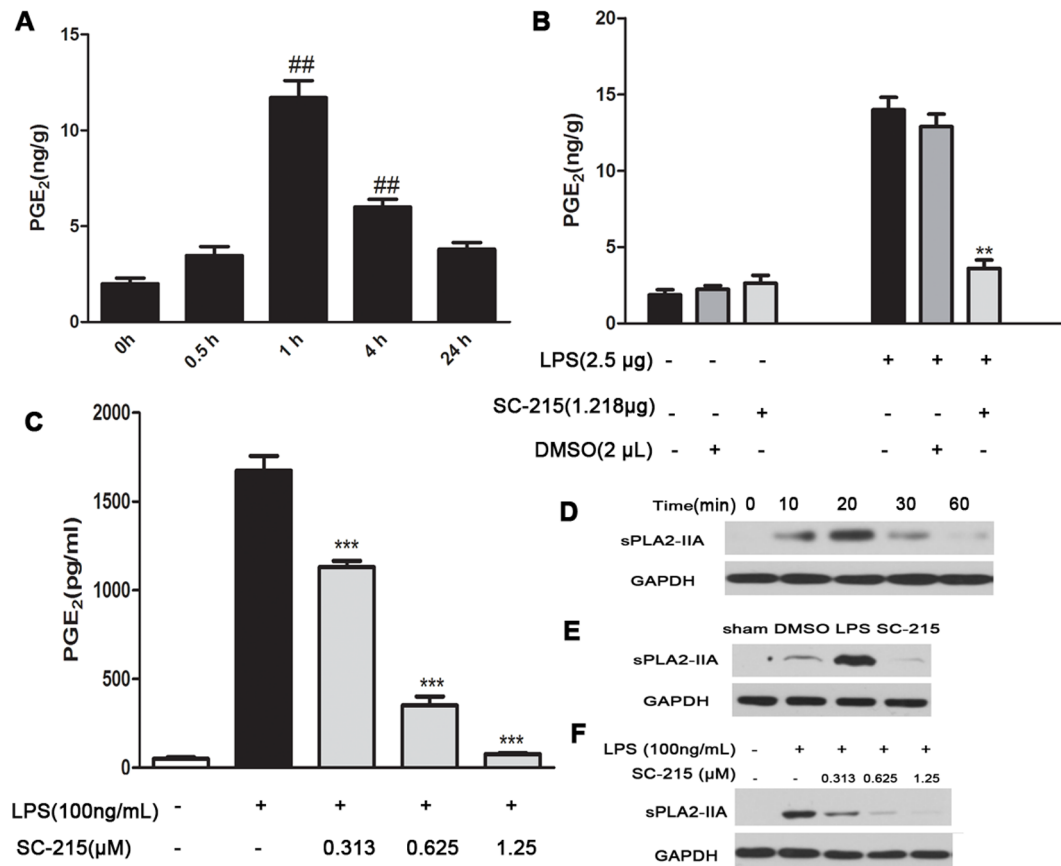

**Figure 1. sPLA<sub>2</sub>-IIA inhibition prevents the release of PGE<sub>2</sub> in LPS-stimulated brain and astrocytes.** (A) Mice (n=4) were given i.c.v. injection with LPS (2.5 μg) for 0, 0.5, 1, 4, 24 hours and PGE<sub>2</sub> in the cortex were detected by ELISA. Since the levels of PGE<sub>2</sub> in the cortex with LPS (2.5 μg) for 1 hour were significantly higher than the control (0 hour), we chose the stimulation of LPS (2.5 μg) for 1 hour in the following experiments in vivo. (B) Inhibition of sPLA<sub>2</sub>-IIA by SC-215 remarkably reduced the production of PGE<sub>2</sub> in the cortex treated with LPS (2.5 μg) for 1 hour. (C) SC-215 lowered LPS-elevated PGE<sub>2</sub> levels in a dose dependent manner in primary astrocytes. (D) The sPLA<sub>2</sub>-IIA protein expression was detected by Western Blot in mice cerebral cortex after treatment with LPS (2.5 μg) for 0, 10, 20, 30, 60 minutes. (E) The LPS-induced sPLA<sub>2</sub>-IIA upregulation was significantly suppressed by the SC-215 in cerebral cortex. (F) The LPS-induced sPLA<sub>2</sub>-IIA protein expression was significantly reduced by SC-215 in a dose-dependent manner in primary astrocytes. Values represent the mean ± S.E.M. of results from five animals in each group. One symbol, *p*<0.05; two symbols, *p*<0.01; three symbols, *p*<0.001. Symbols indicate comparison versus either (#) control or (\*) LPS. doi:10.1371/journal.pone.0077909.g001

lowered the elevated PGE<sub>2</sub> level induced by LPS in a dose dependent manner in astrocytes (Fig. 1C).

### sPLA<sub>2</sub>-IIA inhibition suppresses the activation of ERK1/2 and cPLA<sub>2</sub>α induced by LPS

It is well established that cPLA<sub>2</sub>α is essential for PGE<sub>2</sub> production by supplying arachidonic acid for eicosanoid biosynthesis [31]. As reported previously, MAP kinase contributed to phosphorylation of cPLA<sub>2</sub>α in response to several stimuli [32,33]. To elucidate the mechanisms through which sPLA<sub>2</sub>-IIA regulates LPS-induced PGE<sub>2</sub> generation, we examined the effect of deleting

sPLA<sub>2</sub>-IIA on phosphorylation of cPLA<sub>2</sub>α and its upstream MAP kinases, ERK1/2 and p38 in vitro and in vivo. Rat primary astrocytes were pretreated with or without SC-215 (1.25 μM) for 2 hours and then incubated with 100 ng/mL LPS for up to 4 hours (Fig. 2A), mice were given i.c.v. injection with LPS (2.5 μg) for up to 1 hour (Fig. 2B), phosphoprotein expression was examined by Western blotting. The effect of 1.218 μg SC-215 on cPLA<sub>2</sub>α activation at 1 hour and MAP kinases activation at 10 minutes after LPS stimulation in mice cortex were also measured (Fig. 2C). The data showed that LPS-stimulated cPLA<sub>2</sub>α phosphorylation in a time-dependent manner with a peak within 30 minutes and sustained to reach a maximum at 4 hours in

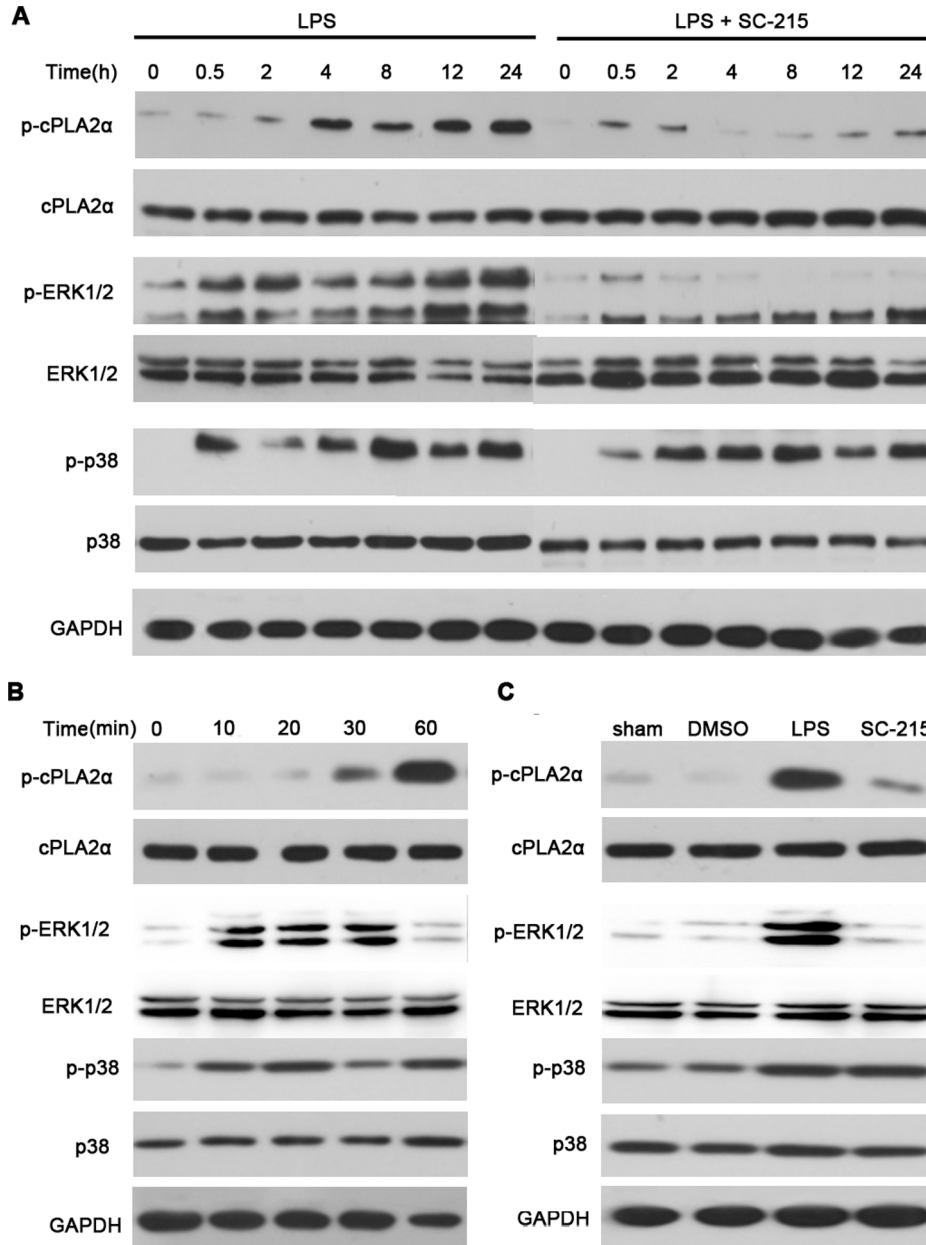

**Figure 2. Inhibition of sPLA<sub>2</sub>-IIA by SC-215 reduces LPS-induced phosphorylation of ERK1/2 and cPLA<sub>2</sub>α.** (A) Astrocytes (n=3) were incubated for 0 to 4 hours with 100 ng/mL LPS or pretreated with 1.25 μM SC-215 for 2 hours before LPS stimulation. (B) Mice (n=4) were given i.c.v. injection with LPS (2.5 μg) alone for up to 1 hour or injected with SC-215 (1.218 μg) 1 hour before LPS stimulation. (C) In the subsequent experiments, the cortex was obtained 10 minutes or 1 hour later to study the effect of SC-215 on LPS-induced phosphorylated ERK1/2, p38 or cPLA<sub>2</sub>α respectively. Expression of phosphorylated (p) and total cPLA<sub>2</sub>α, ERK1/2, and p38 was assessed by Western blotting as described in methods. doi:10.1371/journal.pone.0077909.g002

astrocytes. In contrast, in SC-215-pretreated astrocytes phosphorylation was also detectable within 5–10 minutes, but the further rise in phosphorylation and sustained phosphorylation after 10 minutes were markedly attenuated. Phosphorylation of ERK1/2 preceded that of cPLA<sub>2</sub>α and was apparent within 5 minutes of LPS stimulation in both control or SC-215 pretreated astrocytes. This phosphorylation was sustained to 4 hours in LPS-stimulated astrocytes. In contrast, ERK1/2 phosphorylation declined rapidly in SC-215-pretreated astrocytes and was barely detectable by 10 minutes (Fig. 2A). There was no phosphorylation of cPLA<sub>2</sub>α or ERK1/2 up to 4 hours in the absence of LPS (data not shown). Phosphorylation of p38 MAP kinase was detectable in the absence of SC-215 at all the indicated time points and increased in a similar manner in LPS-treated and SC-215-pretreated astrocytes from 2 hours after LPS stimulation (Fig. 2A). Our *in vivo* study found that LPS caused a time-dependent induction of phospho-cPLA<sub>2</sub>α, phosphorylation of ERK1/2 preceded that of cPLA<sub>2</sub>α and increased to a maximum at 10 minutes in LPS treated brain tissue. The residual phosphorylation was still detectable 30

minutes after stimulation and returned to baseline by 60 minutes (Fig. 2B). In subsequent experiments, changes in the activation of these downstream molecules in cortex after SC-215 treatment were examined. The phosphorylation of cPLA<sub>2</sub>α at 1 hour and phosphorylation of ERK1/2 at 10 minutes were significantly prevented in mice treated with SC-215 prior to LPS challenge, but the induction of phospho-p38 at 10 minutes were not affected upon SC-215 pretreated and remained similar to LPS challenge values (Fig. 2C).

### Inhibition of sPLA<sub>2</sub>-IIA induced protection by regulating ERK1/2 dependent cPLA<sub>2</sub>α activation

Since our results indicated that sPLA<sub>2</sub>-IIA amplified the action of cPLA<sub>2</sub>α and ERK1/2, we then evaluated the role of MAP kinase in cPLA<sub>2</sub>α activation and PGE<sub>2</sub> generation elicited in response to sPLA<sub>2</sub>-IIA signaling. Mice were *i.c.v.* injection of an inhibitor of cPLA<sub>2</sub>α activity (AACOCF3) or MEK1/MEK2 inhibitor (U0126) and then exposed to LPS for 1 hour. Astrocytes were pretreated with p38 MAP kinase inhibitor (SB203580) or

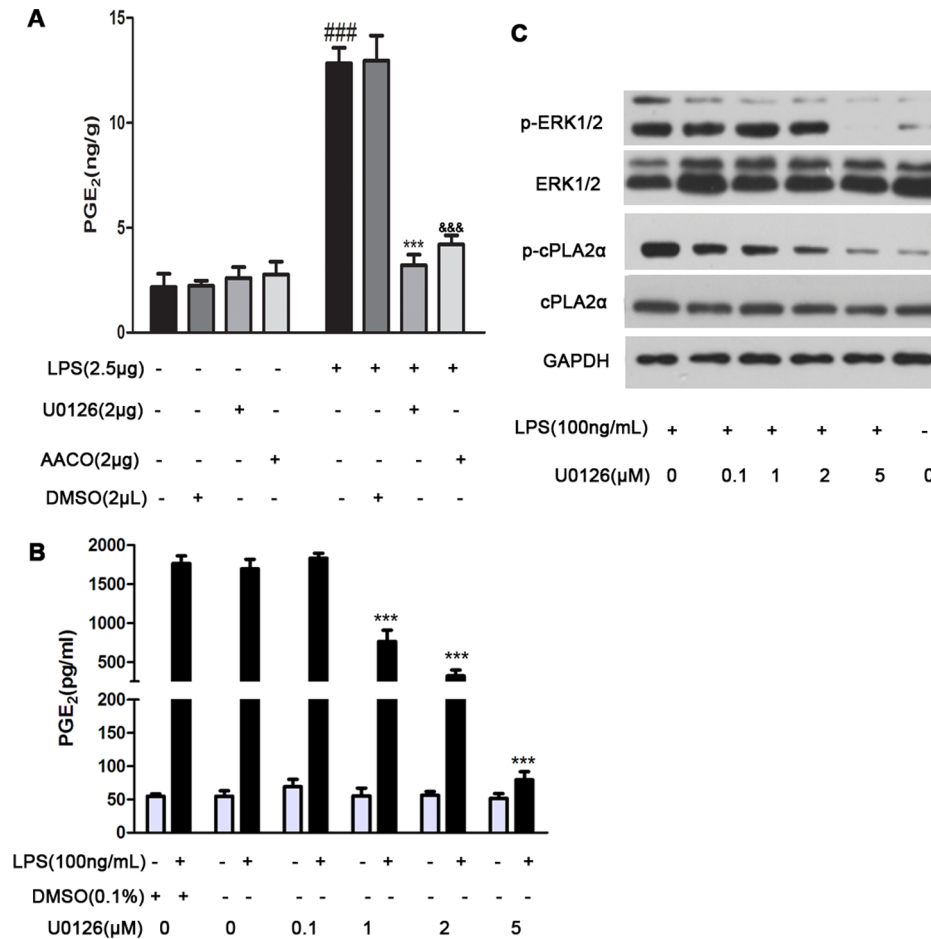

**Figure 3. ERK1/2 regulates the activation of cPLA<sub>2</sub>α and the generation of PGE<sub>2</sub> in LPS-induced mice and astrocytes.** (A) Mice (n=4) were given *i.c.v.* injection with LPS (2.5 μg) alone or injected with AACOCF3 (2 μg) or U0126 (2 μg) 1 hour before LPS stimulation for 1 hour. (B) The *in vitro* effects of U0126 on PGE<sub>2</sub> production and (C) phosphorylation of ERK1/2 and cPLA<sub>2</sub>α in primary rat astrocytes were determined. Astrocytes (n=3) were treated with U0126 (0.1, 1, 2 and 5 μM) for 2 hours before LPS (100 ng/mL) stimulation for up to 24 hours. The PGE<sub>2</sub> levels in tissue homogenate at 1 hour after LPS stimulation (A) or culture supernatants at 24 hours after LPS stimulation (B) were determined by using ELISA-based assay as described in methods, the phosphorylation of ERK1/2 and cPLA<sub>2</sub>α in the cell lysates at 4 hours after LPS challenge (C) were determined by western blot as described in methods. Values represent the mean ± S.E.M. of results from five animals in each group. One symbol, *p*<0.05; two symbols, *p*<0.01; three symbols, *p*<0.001. (##), significant comparisons for LPS versus control; (\*), significant comparisons for U0126 versus LPS; (⊘), significant comparisons for AACOCF3 versus LPS. doi:10.1371/journal.pone.0077909.g003

U0126 before LPS to determine if MAP Kinase altered astrocytes phosphorylation of cPLA<sub>2</sub> $\alpha$  and release of PGE<sub>2</sub> following LPS stimuli. As shown in Fig 3A, AACOCF3 and U0126 infusion did decrease the brain concentrations of PGE<sub>2</sub> by 3.5- and 4-fold, respectively. In agreement, the *in vitro* study showed that U0126 dose-dependently attenuated LPS-induced PGE<sub>2</sub> release at 24 hours from astrocytes. The inhibition was apparent at doses greater than 1  $\mu$ M and was complete with 5  $\mu$ M (Fig. 3B). In contrast, SB203580 did not attenuate LPS-induced PGE<sub>2</sub> release (data not shown). The LPS-induced increase in ERK1/2 and cPLA<sub>2</sub> $\alpha$  phosphorylation at 4 hours was ablated in astrocytes by U0126 in a dose-dependent fashion (Fig. 3C), but pretreated with SB203580 did not affect PGE<sub>2</sub> production induced by LPS (data not shown). These results imply that activation of ERK1/2 but not p38 kinase by LPS regulates cPLA<sub>2</sub> $\alpha$  activation and PGE<sub>2</sub> release in astrocytes and mice cerebral cortex.

### Inhibition of sPLA<sub>2</sub>-IIA prevents LPS-induced activation of COX-2 and microsomal PGE synthase-1 (mPGES-1)

Since synthesis of PGE<sub>2</sub> is catalyzed by enzymes such as cyclooxygenases (COX) and microsomal PGE synthase-1 (mPGES-1), we next investigated the effect of sPLA<sub>2</sub>-IIA inhibition on LPS-induced expression of these proteins in mice cortex. The constitutive COX-1 enzyme was expressed only at low levels in cortex and was not significantly altered by LPS treatment (data not shown). In contrast, the COX-2 enzyme was not expressed under basal conditions in mice cortex but was induced by LPS stimulation and was downregulated in the presence of SC-215 (Fig. 4). The mPGES-1 is the final enzyme in the cascade to ultimately generate PGE<sub>2</sub>. In mice cortex, mPGES-1 was found to be constitutively expressed and was upregulated upon LPS treatment, the change was significantly prevented by sPLA<sub>2</sub>-IIA inhibition (Fig. 4).

## Discussion

Our results revealed that the inhibition of sPLA<sub>2</sub>-IIA by SC-215 showed an ability to diminish the inflammatory response after stimulation with LPS. LPS, a Gram-negative bacterial cell wall component with high pro-inflammatory capabilities, is known to induce various cytotoxic and inflammatory changes via activation of PLA<sub>2</sub> and AA metabolism. Several studies have shown that the exposure of different organs, such as liver [34] and heart [35], to bacterial endotoxin LPS leads to activation of PLA<sub>2</sub>, which releases AA from membrane lipids subsequent to LPS stimulation. Further, COX and LOX enzymes metabolize AA into PGE<sub>2</sub>, TXB and LTB<sub>4</sub>, major inflammatory lipid mediators. As the pre-eminent AA metabolite, PGE<sub>2</sub> is implicated in various inflammatory diseases such as sepsis [36], allodynia [37] and fever [38]. Therefore, regulation of PGE<sub>2</sub> and other AA metabolites by inhibiting or decreasing the expression of AA metabolic enzymes such as PLA<sub>2</sub>, COX-2 could be an effective mechanism for the prevention of inflammation and related pathologies. While there is a large body of data on the mechanisms of AA under the CNS disease conditions, there is limited information on the mechanisms by which the LPS evokes the production of PGE<sub>2</sub> in acute neuroinflammation. The present study was undertaken to provide the first insight into the LPS induced PGE<sub>2</sub> release in mice cerebral cortex and into the molecular mechanism by which sPLA<sub>2</sub>-IIA elicits the PGE<sub>2</sub> generation.

sPLA<sub>2</sub>-IIA is widely expressed in mammalian cells, snake and bee venom. It has been shown to be implicated in the CNS pathologies including Alzheimer's disease, Parkinson's disease, multiple sclerosis, and stroke. Although there is substantial interest

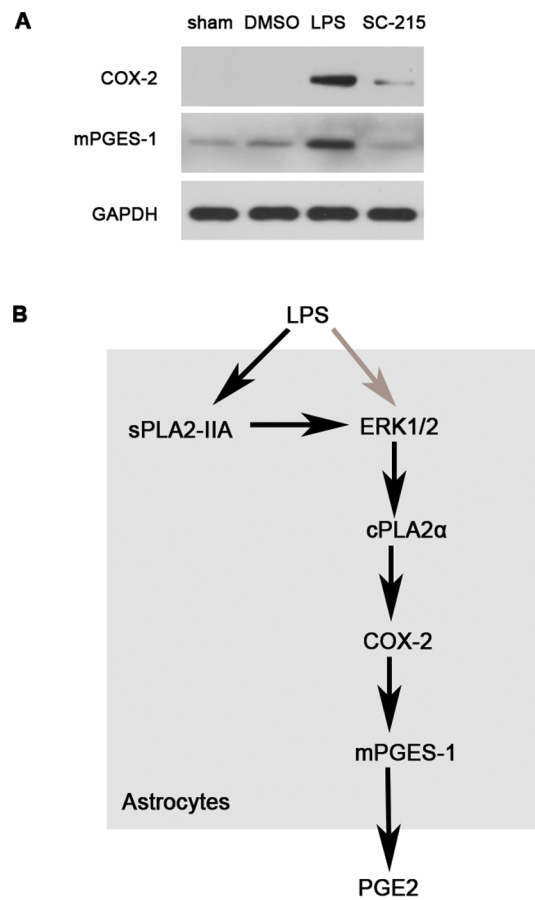

**Figure 4. sPLA<sub>2</sub>-IIA inhibition prevents LPS-induced expression of COX-2 and mPGES-1.** (A) Mice (n=4) were given i.c.v. injection with LPS (2.5  $\mu$ g) alone or injected with SC-215 (2.5  $\mu$ g) 1 hour before LPS stimulation for 1 hour. The cortex was obtained 1 hour later to study the effect of SC-215 on LPS-induced COX-2 and mPGES-1 expression respectively. Protein expressions were assessed by Western blotting as described in methods. (B) Possible molecular mechanism involved in LPS-induced PGE<sub>2</sub> production in astrocytes. LPS activates the sPLA<sub>2</sub>-IIA, leading to increased levels of phospho-ERK1/2. The accumulation of phospho-ERK1/2 levels modulates the downstream activates of cPLA<sub>2</sub> $\alpha$ , cPLA<sub>2</sub> $\alpha$  regulates COX-2 and mPGES-1 enzyme activations which lead to the production of PGE<sub>2</sub>. Black solid arrows represent the novelties of the present study. LPS, lipopolysaccharide; secretory phospholipase A<sub>2</sub>-IIA; cPLA<sub>2</sub> $\alpha$ , cytosolic phospholipase A<sub>2</sub> $\alpha$ ; COX-2, cyclooxygenase-2; PGE<sub>2</sub>, prostaglandin E<sub>2</sub>; mPGES-1, microsomal PGE synthase-1.

doi:10.1371/journal.pone.0077909.g004

in the role of sPLA<sub>2</sub>-IIA in the neuroinflammatory responses in CNS, limited report has described the production of sPLA<sub>2</sub>-IIA in cortex during LPS challenge. In the present study, we demonstrated for the first time that i.c.v. injection of LPS induced sPLA<sub>2</sub>-IIA protein expression from mice cerebral cortex in a time-dependent manner, SC-215 completely suppressed LPS induced sPLA<sub>2</sub>-IIA expression, inhibition of sPLA<sub>2</sub>-IIA was found to cause a significant decrease of PGE<sub>2</sub> generation. Up-regulation of sPLA<sub>2</sub>-IIA protein and immunoreactivity is inducible following various stimuli in a wide variety of inflammatory cells such as macrophages [39], mast cells [40], human eosinophils [41]. The expression pattern of sPLA<sub>2</sub>-IIA in the CNS is complex, thus, several possible mechanisms could explain the *in vivo* neuroprotective effect of ablating sPLA<sub>2</sub>-IIA in the i.c.v. LPS model. In CNS, sPLA<sub>2</sub>-IIA is present mainly in astrocytes. In line with this

result, our RT-PCR analysis revealed that LPS exposure led to a time- and dose-dependent increase of sPLA<sub>2</sub>-IIA mRNA expression in murine primary astrocytes (data not shown). Thus, we directly tested the hypothesis that sPLA<sub>2</sub>-IIA was critical to astrocytes activation and release of PGE<sub>2</sub>. We observed that LPS evoked marked PGE<sub>2</sub> generation in primary astrocytes in a time-dependent fashion accompanied by release of sPLA<sub>2</sub>-IIA (data not shown). We reasoned that pharmacologic suppression of sPLA<sub>2</sub>-IIA in cultures should produce the same results as in vivo. Indeed, SC-215 dose-dependently suppressed PGE<sub>2</sub> generation in astrocytes (Fig. 1C). Given the concordance between the in vitro and in vivo findings, these data strongly implicate that the inhibition of sPLA<sub>2</sub>-IIA alleviates the release of PGE<sub>2</sub> following the neuroinflammation induced by LPS.

To our knowledge, cPLA<sub>2</sub>α is the only known PLA<sub>2</sub> with pronounced specificity for *sn*-2 arachidonoyl-containing phospholipids [42,43] and is generally thought to play a crucial role in maintaining cellular AA levels [44]. Recently study reveals that the phosphorylation of cPLA<sub>2</sub>α Ser505 by MAP kinases is essential for agonist-induced AA release [45]. Using inhibitors of p38 MAP kinase and MEK1/MEK2, we demonstrated that ERK1/2, not p38 was required for the sequential activation of cPLA<sub>2</sub>α and further release of PGE<sub>2</sub> induced by LPS. U0126 could suppress LPS-stimulated activation of cPLA<sub>2</sub>α and block PGE<sub>2</sub> release from astrocytes in a dose-dependent manner. Moreover, U0126 could also attenuate LPS-evoked PGE<sub>2</sub> release in mice cerebral cortex (Fig. 3). While the early phases of ERK1/2 and cPLA<sub>2</sub>α were intact in SC-215 pretreated astrocytes and their sequential sustained phosphorylation was attenuated (Fig. 2). The results was compatible with experiments in vivo, strongly confirming that sPLA<sub>2</sub>-IIA regulates the activation of cPLA<sub>2</sub>α by sustaining the activation of ERK1/2, which is critical for the sustained phosphorylation of cPLA<sub>2</sub>α in response to LPS stimulation.

COX-2 is a crucial enzyme for the production of PGE<sub>2</sub> during inflammation and it has been shown to be dependent upon the activation of cPLA<sub>2</sub>α via a feedback mechanism as cPLA<sub>2</sub>α provides the substrate (AA) for COX-2 [46]. AA is further metabolized by COX-2 into prostaglandin G<sub>2</sub> (PGG<sub>2</sub>), which upon conversion to PGH<sub>2</sub> serves as the substrate for specific prostaglandin synthases such as mPGES-1 [22]. Thus, inhibition

of COX-2 in combination with down-stream mPGES-1 appears to be responsible for the decreased biosynthesis of PGE<sub>2</sub> and the alleviation of inflammation. In the present study, we investigated whether the expression of COX-2 and mPGES-1 is regulated by sPLA<sub>2</sub>-IIA. Our results demonstrate that SC-215 significantly decreased the expression of these two enzymes (Fig. 4), confirming that the inhibition of sPLA<sub>2</sub>-IIA suppressed the synthesis of PGE<sub>2</sub> and the inflammation induced by LPS in mice.

In conclusion, our data provides the first dissection about the role of sPLA<sub>2</sub>-IIA in the neuroinflammation induced by LPS in C57BL/6 mice cerebral cortex and primary astrocytes. We demonstrate a role of sPLA<sub>2</sub>-IIA in amplifying CNS inflammation, especially in regulating the activation of cPLA<sub>2</sub>α by sustaining the activation of ERK1/2. The elevated signaling of the sPLA<sub>2</sub>-IIA-ERK1/2-cPLA<sub>2</sub>α-COX-2-mPGES-1 pathway contributes to PGE<sub>2</sub> overexpression and secretion in primary astrocytes and mice cortex. This amplification can be reversed by sPLA<sub>2</sub>-IIA specific inhibition, which indicated that sPLA<sub>2</sub>-IIA mediated signaling pathway might be a potential target for the treatment of the acute neuroinflammation.

## Supporting Information

**Figure S1 Primary microglia is not capable of responding to LPS in the production of sPLA<sub>2</sub>-IIA at the transcriptional and translational levels.** (A) and (C) show the mRNA expression of sPLA<sub>2</sub>-IIA and (B) and (D) show the corresponding protein data. (A and B) Primary microglia (n = 3) were stimulated with LPS (1μg/mL) for 0, 0.2, 0.5, 2, 4, 24, 48 hours. (C and D) Primary microglia (n = 3) were treated with LPS (0, 1, 10, 100, 1000ng/mL) for 24 hours. The mRNA and protein levels of sPLA<sub>2</sub>-IIA were determined by western blot as described in methods. (TIF)

## Author Contributions

Conceived and designed the experiments: YX LC XZ. Performed the experiments: YX XL XW BS. Analyzed the data: YX TW. Contributed reagents/materials/analysis tools: LC HL. Wrote the paper: YX. Revised the manuscript: TW XZ.

## References

- Polazzi E, Contestabile A (2002) Reciprocal interactions between microglia and neurons: from survival to neuropathology. *Rev Neurosci* 13: 221–242.
- Kummer MP, Hermes M, Delekarte A, Hammerschmidt T, Kumar S, et al. (2011) Nitration of tyrosine 10 critically enhances amyloid beta aggregation and plaque formation. *Neuron* 71: 833–844.
- McGeer EG, McGeer PL (2003) Inflammatory processes in Alzheimer's disease. *Prog Neuropsychopharmacol Biol Psychiatry* 27: 741–749.
- Guo JT, Yu J, Grass D, de Beer FC, Kindy MS (2002) Inflammation-dependent cerebral deposition of serum amyloid A protein in a mouse model of amyloidosis. *J Neurosci* 22: 5900–5909.
- Carasso RL, Vardi J, Rabay JM, Zor U, Streifler M (1977) Measurement of prostaglandin E2 in cerebrospinal fluid in patients suffering from stroke. *J Neurol Neurosurg Psychiatry* 40: 967–969.
- Gao W, Schmidtko A, Wobst I, Lu R, Angioni C, et al. (2009) Prostaglandin D2 produced by hematopoietic prostaglandin D synthase contributes to LPS-induced fever. *J Physiol Pharmacol* 60: 145–150.
- Murakami M, Kudo I (2002) Phospholipase A2. *J Biochem* 131: 285–292.
- Kramer RM, Hession C, Johansen B, Hayes G, McGray P, et al. (1989) Structure and properties of a human non-pancreatic phospholipase A2. *J Biol Chem* 264: 5768–5775.
- Seilhamer JJ, Plant S, Pruzanski W, Schilling J, Stefanski E, et al. (1989) Multiple forms of phospholipase A2 in arthritic synovial fluid. *J Biochem* 106: 38–42.
- Jaulmes A, Janvier B, Andreani M, Raymondjean M (2005) Autocrine and paracrine transcriptional regulation of type IIA secretory phospholipase A2 gene in vascular smooth muscle cells. *Arterioscler Thromb Vasc Biol* 25: 1161–1167.
- Ibeas E, Fuentes L, Martin R, Hernandez M, Nieto ML (2009) Secreted phospholipase A2 type IIA as a mediator connecting innate and adaptive immunity: new role in atherosclerosis. *Cardiovasc Res* 81: 54–63.
- Chalbot S, Zetterberg H, Blennow K, Fladby T, Grundke-Iqbal I, et al. (2009) Cerebrospinal fluid secretory Ca<sup>2+</sup>-dependent phospholipase A2 activity is increased in Alzheimer disease. *Clin Chem* 55: 2171–2179.
- Yagami T, Ueda K, Asakura K, Hata S, Kuroda T, et al. (2002) Human group IIA secretory phospholipase A2 induces neuronal cell death via apoptosis. *Mol Pharmacol* 61: 114–126.
- Murakami M, Kambe T, Shimbara S, Kudo I (1999) Functional coupling between various phospholipase A2s and cyclooxygenases in immediate and delayed prostanoid biosynthetic pathways. *J Biol Chem* 274: 3103–3115.
- Kramer RM, Roberts EF, Um SL, Borsch-Haubold AG, Watson SP, et al. (1996) p38 mitogen-activated protein kinase phosphorylates cytosolic phospholipase A2 (cPLA2) in thrombin-stimulated platelets. Evidence that proline-directed phosphorylation is not required for mobilization of arachidonic acid by cPLA2. *J Biol Chem* 271: 27723–27729.
- Evans JH, Ferguson DJ, Leslie CC (2002) Inhibition of the MEK1/ERK pathway reduces arachidonic acid release independently of cPLA2 phosphorylation and translocation. *BMC Biochem* 3: 30.
- Farooqui AA, Horrocks LA, Farooqui T (2007) Modulation of inflammation in brain: a matter of fat. *J Neurochem* 101: 577–599.
- Strokin M, Sergeeva M, Reiser G (2007) Prostaglandin synthesis in rat brain astrocytes is under the control of the n-3 docosahexaenoic acid, released by group VIB calcium-independent phospholipase A2. *J Neurochem* 102: 1771–1782.
- Teismann P, Tieu K, Cohen O, Choi DK, Wu DC, et al. (2003) Pathogenic role of glial cells in Parkinson's disease. *Mov Disord* 18: 121–129.
- Chen Y, Swanson RA (2003) Astrocytes and brain injury. *J Cereb Blood Flow Metab* 23: 137–149.

21. Carpentier PA, Duncan DS, Miller SD (2008) Glial toll-like receptor signaling in central nervous system infection and autoimmunity. *Brain Behav Immun* 22: 140–147.
22. Johann S, Kampmann E, Denecke B, Arnold S, Kipp M, et al. (2008) Expression of enzymes involved in the prostanoid metabolism by cortical astrocytes after LPS-induced inflammation. *J Mol Neurosci* 34: 177–185.
23. Xu J, Chalimoniuk M, Shu Y, Simonyi A, Sun AY, et al. (2003) Prostaglandin E2 production in astrocytes: regulation by cytokines, extracellular ATP, and oxidative agents. *Prostaglandins Leukot Essent Fatty Acids* 69: 437–448.
24. Zhou H, Lapointe BM, Clark SR, Zbytniuk L, Kubes P (2006) A requirement for microglial TLR4 in leukocyte recruitment into brain in response to lipopolysaccharide. *J Immunol* 177: 8103–8110.
25. Johnson RW, Gheusi G, Segreti S, Dantzer R, Kelley KW (1997) C3H/HeJ mice are refractory to lipopolysaccharide in the brain. *Brain Res* 752: 219–226.
26. Di Santo E, Alonzi T, Fattori E, Poli V, Ciliberto G, et al. (1996) Overexpression of interleukin-6 in the central nervous system of transgenic mice increases central but not systemic proinflammatory cytokine production. *Brain Res* 740: 239–244.
27. McCarthy KD, de Vellis J (1980) Preparation of separate astroglial and oligodendroglial cell cultures from rat cerebral tissue. *J Cell Biol* 85: 890–902.
28. Kawano T, Anrather J, Zhou P, Park L, Wang G, et al. (2006) Prostaglandin E2 EP1 receptors: downstream effectors of COX-2 neurotoxicity. *Nat Med* 12: 225–229.
29. Arumugam TV, Arnold N, Proctor LM, Newman M, Reid RC, et al. (2003) Comparative protection against rat intestinal reperfusion injury by a new inhibitor of sPLA<sub>2</sub>, COX-1 and COX-2 selective inhibitors, and an LTC<sub>4</sub> receptor antagonist. *Br J Pharmacol* 140: 71–80.
30. Hansford KA, Reid RC, Clark CI, Tyndall JD, Whitehouse MW, et al. (2003) D-Tyrosine as a chiral precursor to potent inhibitors of human nonpancreatic secretory phospholipase A2 (IIa) with antiinflammatory activity. *Chembiochem* 4: 181–185.
31. Bonventre JV, Huang Z, Taheri MR, O'Leary E, Li E, et al. (1997) Reduced fertility and postischemic brain injury in mice deficient in cytosolic phospholipase A2. *Nature* 390: 622–625.
32. Pavicevic Z, Leslie CC, Malik KU (2008) cPLA<sub>2</sub> phosphorylation at serine-515 and serine-505 is required for arachidonic acid release in vascular smooth muscle cells. *J Lipid Res* 49: 724–737.
33. Tian W, Wijewickrama GT, Kim JH, Das S, Tun MP, et al. (2008) Mechanism of regulation of group IVA phospholipase A2 activity by Ser727 phosphorylation. *J Biol Chem* 283: 3960–3971.
34. Dieter P, Kolada A, Kamionka S, Schadow A, Kaszkin M (2002) Lipopolysaccharide-induced release of arachidonic acid and prostaglandins in liver macrophages: regulation by Group IV cytosolic phospholipase A2, but not by Group V and Group IIA secretory phospholipase A2. *Cell Signal* 14: 199–204.
35. Cannon TR, Mann GE, Baydoun AR (1998) Mechanisms of acute vasodilator response to bacterial lipopolysaccharide in the rat coronary microcirculation. *Br J Pharmacol* 123: 637–644.
36. Takakuwa T, Endo S, Nakae H, Kikichi M, Inada K, et al. (1994) PAF acetylhydrolase and arachidonic acid metabolite levels in patients with sepsis. *Res Commun Chem Pathol Pharmacol* 84: 283–290.
37. Saito O, Svensson CI, Buczynski MW, Wegner K, Hua XY, et al. (2010) Spinal glial TLR4-mediated nociception and production of prostaglandin E<sub>2</sub> and TNF. *Br J Pharmacol* 160: 1754–1764.
38. Kwiatkowski M, Soriano RN, Araujo RM, Azevedo LU, Batalhao ME, et al. (2013) Hydrogen sulfide inhibits preoptic prostaglandin E2 production during endotoxemia. *Exp Neurol* 240: 88–95.
39. Wu YZ, Medjane S, Chabot S, Kubrusly FS, Raw I, et al. (2003) Surfactant protein-A and phosphatidylglycerol suppress type IIA phospholipase A2 synthesis via nuclear factor-kappaB. *Am J Respir Crit Care Med* 168: 692–699.
40. Fonteh AN, Atsumi G, LaPorte T, Chilton FH (2000) Secretory phospholipase A2 receptor-mediated activation of cytosolic phospholipase A2 in murine bone marrow-derived mast cells. *J Immunol* 165: 2773–2782.
41. Blom M, Tool AT, Wever PC, Wolbink GJ, Brouwer MC, et al. (1998) Human eosinophils express, relative to other circulating leukocytes, large amounts of secretory 14-kD phospholipase A2. *Blood* 91: 3037–3043.
42. Clark JD, Lin LL, Kriz RW, Ramesha CS, Sultzman LA, et al. (1991) A novel arachidonic acid-selective cytosolic PLA<sub>2</sub> contains a Ca(2+)-dependent translocation domain with homology to PKC and GAP. *Cell* 65: 1043–1051.
43. Sharp JD, White DL, Chiou XG, Goodson T, Gamboa GC, et al. (1991) Molecular cloning and expression of human Ca(2+)-sensitive cytosolic phospholipase A2. *J Biol Chem* 266: 14850–14853.
44. Leslie CC (1997) Properties and regulation of cytosolic phospholipase A2. *J Biol Chem* 272: 16709–16712.
45. Lin LL, Wartmann M, Lin AY, Knopf JL, Seth A, et al. (1993) cPLA<sub>2</sub> is phosphorylated and activated by MAP kinase. *Cell* 72: 269–278.
46. Bosetti F, Weerasinghe GR (2003) The expression of brain cyclooxygenase-2 is down-regulated in the cytosolic phospholipase A2 knockout mouse. *J Neurochem* 87: 1471–1477.
